# Supplementary material
Source: PubMed Central journal article supplement (PMC2863394)
Supplement: supp_17_5_853__1.pdf [file supp_17_5_853__1.pdf]

- 1 Supplementary table S1. **Full list of recombinant proteins.** The following table lists
- 2 properties of the recombinant proteins used in this study. Components of the recombinant
- 3 protein vaccine are underlined and proteins associated to a protective immune response
- 4 induced by T1/44 vaccination are marked in bold.

| ORF             | Size (aa) | TM regions | Recombinant ID | Coverage (aa) | Coverage (%) | Molecular mass (kDa)* |
|-----------------|-----------|------------|----------------|---------------|--------------|-----------------------|
| MSC_0013        | 549       | 0          | R13            | 25-549        | 95           | 78.3                  |
| MSC_0051        | 182       | 1          | R51            | 21-182        | 89           | 37.4                  |
| MSC_0061        | 224       |            | R61            | 26-224        | 89           | 41.4                  |
| <b>MSC_0079</b> | 447       |            | R79            | 19-447        | 96           | 66.3                  |
| MSC_0104        | 59        |            | R104           | 19-59         | 69           | 22.8                  |
| <u>MSC_0117</u> | 238       |            | R117           | 26-238        | 89           | 42.6                  |
| MSC_0122        | 163       |            | R122           | 19-155        | 84           | 33.6                  |
| <b>MSC_0136</b> | 322       | 1          | R136           | 19-298        | 87           | 50.7                  |
| MSC_0173        | 194       |            | R173           | 15-194        | 93           | 39.4                  |
| MSC_0177        | 434       |            | R177           | 13-434        | 97           | 66.6                  |
| MSC_0187        | 388       | 5          | R187           | 268-388       | 31           | 30.9                  |
| MSC_0198        | 227       |            | R198           | 37-202        | 73           | 37.3                  |
| MSC_0203        | 236       |            | R203           | 22-236        | 91           | 43.9                  |
| MSC_0209        | 430       |            | R209           | 28-430        | 94           | 64.9                  |
| MSC_0240        | 554       |            | R240           | 22-554        | 96           | 79.6                  |
| <b>MSC_0271</b> | 651       |            | R271           | 23-651        | 97           | 91.1                  |
| MSC_0285        | 218       |            | R285           | 29-218        | 87           | 40.4                  |
| MSC_0292        | 192       | 1          | R292           | 55-192        | 72           | 34.8                  |
| MSC_0298        | 353       | 5          | R298           | 209-353       | 41           | 35.4                  |
| MSC_0317        | 89        |            | R317           | 22-89         | 76           | 26.1                  |
| MSC_0320        | 289       |            | R320           | 32-289        | 89           | 48.8                  |
| MSC_0321        | 286       |            | R321           | 32-271        | 84           | 46.9                  |
| MSC_0322        | 375       |            | R322           | 18-375        | 96           | 61.6                  |
| MSC_0344        | 93        |            | R344           | 21-93         | 79           | 26.7                  |
| MSC_0346        | 108       |            | R346           | 29-108        | 74           | 27.8                  |
| <u>MSC_0364</u> | 156       |            | R364           | 29-156        | 82           | 33.9                  |
| MSC_0367        | 101       |            | R367           | 40-101        | 61           | 25.2                  |
| MSC_0390        | 59        |            | R390           | 24-59         | 61           | 22                    |
| MSC_0392        | 114       |            | R392           | 23-114        | 81           | 28.5                  |
| MSC_0397        | 237       | 1          | R397           | 21-205        | 78           | 38.3                  |
| MSC_0419        | 407       |            | R419           | 23-407        | 95           | 63.7                  |
| MSC_0422        | 509       | 1          | R422           | 33-509        | 94           | 72                    |
| <b>MSC_0431</b> | 356       |            | R431           | 25-356        | 93           | 56.5                  |
| MSC_0521        | 50        |            | R521           | 32-50         | 38           | 20.4                  |
| MSC_0540        | 179       |            | R540           | 28-179        | 85           | 35.2                  |
| MSC_0552        | 205       |            | R552           | 21-205        | 90           | 40                    |
| MSC_0570        | 224       |            | R570           | 17-224        | 93           | 42.2                  |
| MSC_0574        | 238       |            | R574           | 24-238        | 90           | 42.9                  |
| MSC_0632        | 147       |            | R632           | 26-147        | 83           | 32.1                  |
| MSC_0653        | 385       |            | R653           | 20-385        | 95           | 60.3                  |
| MSC_0668        | 407       | 1          | R668           | 33-407        | 92           | 62.2                  |
| MSC_0693        | 120       |            | R693           | 25-120        | 80           | 29.6                  |
| MSC_0707        | 159       | 1          | R707           | 17-130        | 72           | 30.8                  |
| MSC_0711        | 270       |            | R711           | 19-270        | 93           | 46.3                  |
| MSC_0754        | 214       | 3          | R754           | 27-93         | 31           | 25.8                  |
| MSC_0755        | 182       |            | R755           | 19-182        | 90           | 37.1                  |
| MSC_0757        | 253       | 3          | R757           | 124-253       | 51           | 33.8                  |
| MSC_0809        | 292       |            | R809           | 17-292        | 95           | 50.2                  |
| MSC_0813        | 507       | 1          | R813           | 25-430        | 80           | 64.6                  |
| MSC_0816        | 405       |            | R816           | 23-405        | 95           | 62.1                  |

|                 |     |    |        |         |     |      |
|-----------------|-----|----|--------|---------|-----|------|
| MSC 0844        | 286 |    | R844   | 34-286  | 88  | 47.9 |
| <u>MSC 0847</u> | 257 |    | R847   | 28-257  | 89  | 44.9 |
| MSC 0858        | 160 |    | R858   | 29-160  | 83  | 33.6 |
| MSC 0906        | 337 | 2  | R906   | 36-74   | 12  | 22.4 |
| MSC 0910        | 526 | 11 | R910   | 271-310 | 8   | 22.2 |
| MSC 0922        | 400 |    | R922   | 19-400  | 96  | 63.8 |
| MSC 0923        | 276 | 1  | R923   | 33-276  | 88  | 47.2 |
| MSC 0924        | 310 |    | R924   | 35-310  | 89  | 50.7 |
| MSC 0990        | 290 |    | R990   | 25-290  | 92  | 48.4 |
| MSC 0992        | 113 |    | R992   | 23-113  | 81  | 29   |
| MSC 1001        | 68  |    | R1001  | 19-68   | 74  | 23.5 |
| <u>MSC 1033</u> | 80  |    | R1033  | 22-80   | 74  | 25.6 |
| <b>MSC_1046</b> | 445 |    | R1046  | 24-445  | 95  | 67.7 |
| MSC 1050        | 258 |    | R1050  | 17-258  | 94  | 46.6 |
| MSC 1052        | 152 |    | R1052  | 17-152  | 89  | 34.4 |
| NA              | NA  |    | HisABP | 1-166   | 100 | 18.2 |

- 1 \*Size of recombinant protein (incl. His<sub>6</sub>ABP), calculated using the Protparam tool
- 2 (www.expasy.org). NA= not applicable.

1 Supplementary table S2. Complement fixation titers within the three cattle groups, expressed as the reciprocal of serum dilution.

| Day | Animal ID               |     |     |     |       |                                   |       |       |      |      |                            |      |     |      |      |
|-----|-------------------------|-----|-----|-----|-------|-----------------------------------|-------|-------|------|------|----------------------------|------|-----|------|------|
|     | <i>T1/44 vaccinated</i> |     |     |     |       | <i>Purified protein immunized</i> |       |       |      |      | <i>In contact controls</i> |      |     |      |      |
|     | 146                     | 178 | 179 | 181 | 192   | 150                               | 155   | 161   | 162  | 189  | 145                        | 165  | 175 | 177  | 188  |
| -33 | 0                       | 0   | 0   | 0   | 0     | 0                                 | 0     | 0     | 0    | 0    | 0                          | 0    | 0   | 0    | 0    |
| -16 | 60                      | 80  | 0   | 0   | 0     | 0                                 | 0     | 0     | 0    | 0    | N/A                        | N/A  | N/A | N/A  | N/A  |
| -2  | 320                     | 160 | 40  | 160 | 40    | 40                                | 0     | 0     | 0    | 0    | 0                          | 0    | 0   | 0    | 0    |
| 6   | 160                     | 80  | 40  | 160 | 20    | 40                                | 0     | 0     | 0    | 0    | 0                          | 0    | 0   | 0    | 0    |
| 11  | 160                     | 40  | 40  | 160 | 40    | 40                                | 0     | 0     | 0    | 0    | 0                          | 0    | 0   | 0    | 0    |
| 20  | 160                     | 40  | 0   | 80  | 0     | 0                                 | 0     | 0     | 0    | 0    | 0                          | 0    | 0   | 0    | 0    |
| 27  | 160                     | 160 | 40  | 160 | 40    | 10                                | 0     | 0     | 0    | 0    | 0                          | 40   | 0   | 0    | 0    |
| 34  | 160                     | 160 | 40  | 160 | 40    | 40                                | 0     | 0     | 40   | 0    | 0                          | 40   | 0   | 0    | 0    |
| 41  | 160                     | 160 | 10  | 160 | 40    | 40                                | 0     | 0     | 40   | 0    | 0                          | 40   | 0   | 0    | 0    |
| 48  | 80                      | 160 | 0   | 80  | 320   | 0                                 | 0     | 0     | 0    | 40   | 0                          | 40   | 0   | 0    | 0    |
| 55  | 40                      | 20  | 20  | 20  | 1280  | 0                                 | 0     | 0     | 20   | 320  | 0                          | 640  | 0   | 0    | 0    |
| 62  | 40                      | 20  | 10  | 20  | 1280  | 10                                | 0     | 0     | 640  | 1280 | 0                          | 640  | 0   | 0    | 0    |
| 69  | 20                      | 10  | 20  | 10  | 10240 | 0                                 | 320   | 0     | 2560 | 2560 | 0                          | 1280 | 0   | 0    | 160  |
| 76  | 80                      | 40  | 10  | 0   | 2560  | 320                               | 640   | 0     | 2560 | 2560 | 0                          | 1280 | 20  | 0    | 80   |
| 83  | 40                      | 0   | 20  | 0   | 2560  | 80                                | 5120  | 0     | 5120 | 1280 | 0                          | 1280 | 80  | 0    | 160  |
| 90  | 40                      | 20  | 20  | 0   | 1280  | 320                               | 10240 | 10    | 5120 | 2560 | 0                          | 1280 | 320 | 80   | 320  |
| 97  | 80                      | 20  | 20  | 0   | 320   | 640                               | 2560  | 40    | 1280 | 1280 | 0                          | 1280 | 640 | 640  | 2560 |
| 104 | 40                      | 0   | 10  | 0   | 320   | 640                               | 1280  | 10240 | 1280 | 1280 | 40                         | 320  | 640 | 5120 | 5120 |
| 111 | 20                      | 0   | 0   | 0   | 320   | 640                               | 2560  | 5120  | 1280 | 1280 | 160                        | 320  | 640 | 5120 | 2560 |
| 118 | 0                       | 0   | 0   | 0   | 320   | 640                               | 1280  | 5120  | 640  | 640  | 320                        | 320  | 320 | 5120 | 5120 |
| 125 | 0                       | 0   | 0   | 0   | 160   | 2560                              | 1280  | 2560  | 320  | 320  | 640                        | 160  | 160 | 5120 | 1280 |

2 N/A = Not available.
